# Supplementary material for: Chemically robust succinimide-group-assisted irreversible bonding of poly(dimethylsiloxane)–thermoplastic microfluidic devices at room temperature
Source: Royal Society of Chemistry journal article supplement (doi:10.1039/d0an01268h), 2020-01-01
Supplement: d0an01268h2.pdf [file d0an01268h2.pdf]

# Chemically robust succinimide group-assisted irreversible bonding of poly(dimethylsiloxane)–thermoplastic microfluidic devices at room temperature

Rajamanickam Sivakumar<sup>a</sup>, and Nae Yoon Lee<sup>\*b</sup>

<sup>a</sup> Department of Industrial and Environmental Engineering, College of Industrial Environmental Engineering, Gachon University, 1342 Seongnam-daero, Sujeong-gu, Seongnam-si, Gyeonggi-do, 13120, Korea.

<sup>b\*</sup> Department of BioNano Technology, Gachon University, 1342 Seongnam-daero, Sujeong-gu, Seongnam-si, Gyeonggi-do, 13120, Korea.  
E-mail: nylee@gachon.ac.kr (Prof. N.Y.Lee)

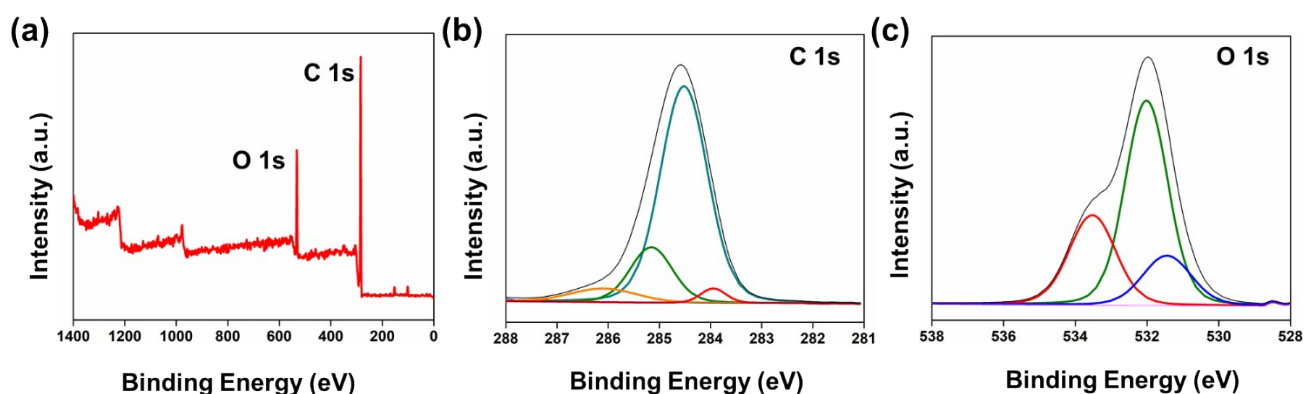

**Fig S1.** High resolution XPS spectra for PC. (a) survey spectrum, (b) C1s, and (c) O1s.

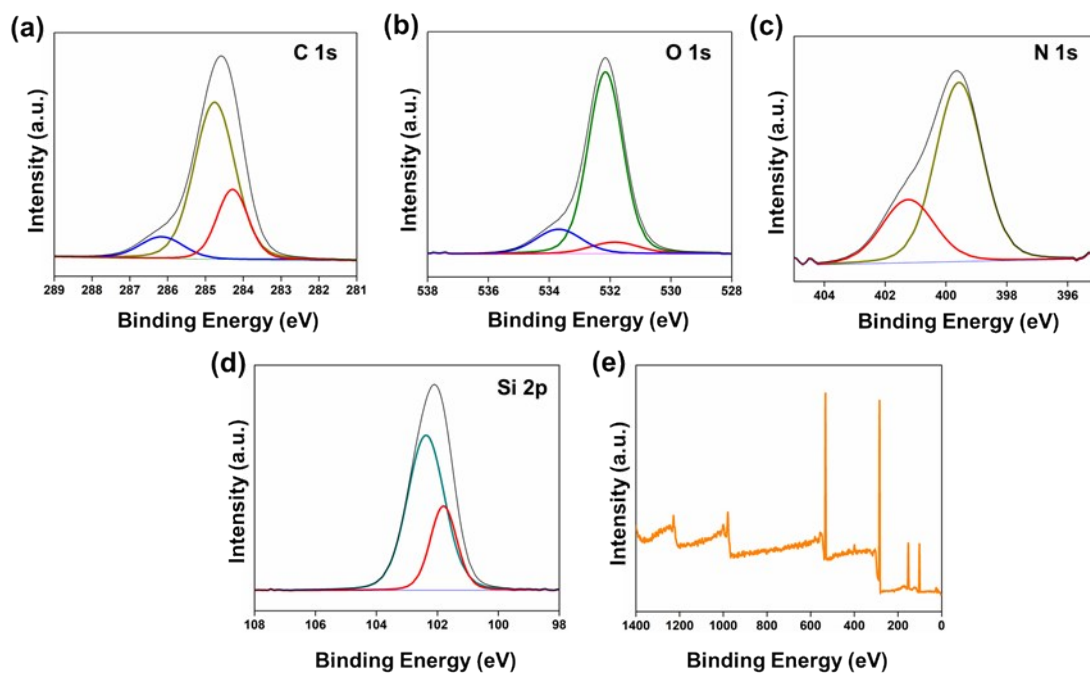

**Fig S2.** High resolution XPS spectra for APTES-coated PC. (a) C1s, (b) O1s, (c) N1s (d) Si2p and (e) survey spectrum.

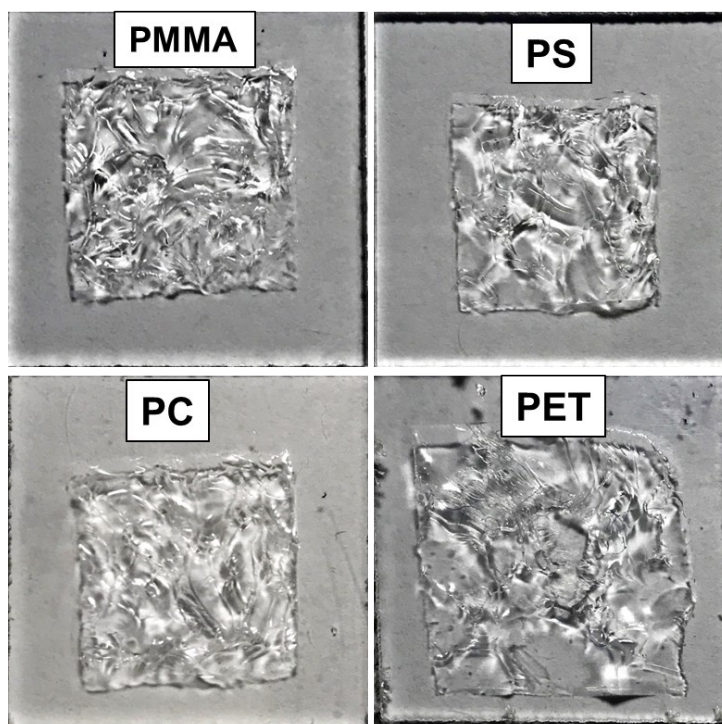

**Fig S3.** Results of delamination test when various substrates (PMMA, PS, PC, and PET) were used for bonding with PDMS.

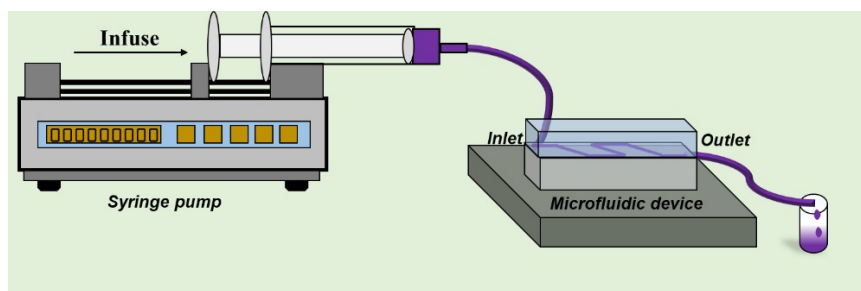

**Fig S4.** Schematic illustration of leakage test.

**Table S1**

Atomic ratio of pristine PDMS and TESPSA coated PDMS

| Substrate          | Spectrum    | Atomic ratio (%) |
|--------------------|-------------|------------------|
| Pristine PDMS      | O1s         | 42.9             |
|                    | C1s         | 40.1             |
|                    | <b>Si2p</b> | <b>16.8</b>      |
| TESPSA coated PDMS | O1s         | 41.0             |
|                    | C1s         | 41.1             |
|                    | <b>Si2p</b> | <b>17.8</b>      |
